# Supplementary material
Source: PubMed Central journal article supplement (PMC4403193)
Supplement: pnas.201423107SI.pdf [file pnas.201423107SI.pdf]

# Supporting Information

Séguéla-Arnaud et al. 10.1073/pnas.1423107112

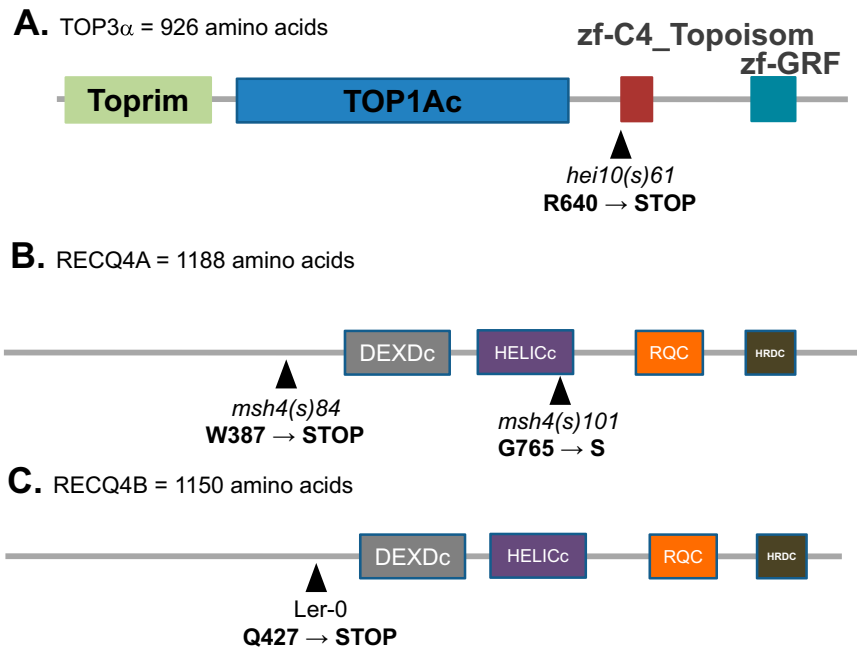

**Fig. S1.** Schematic representation of the TOP3 $\alpha$ , RECQ4A, and RECQ4B protein domains. (A) Schematic representation of TOP3 $\alpha$  domains. The position of the *top3 $\alpha$ -R640X* mutation is shown. (B) Schematic representation of RECQ4A domains. The positions of the *msh4(s)84* and *msh4(s)101* mutations are shown. (C) Schematic representation of RECQ4B domains. The position of the natural mutation of the Landsberg strain is shown.

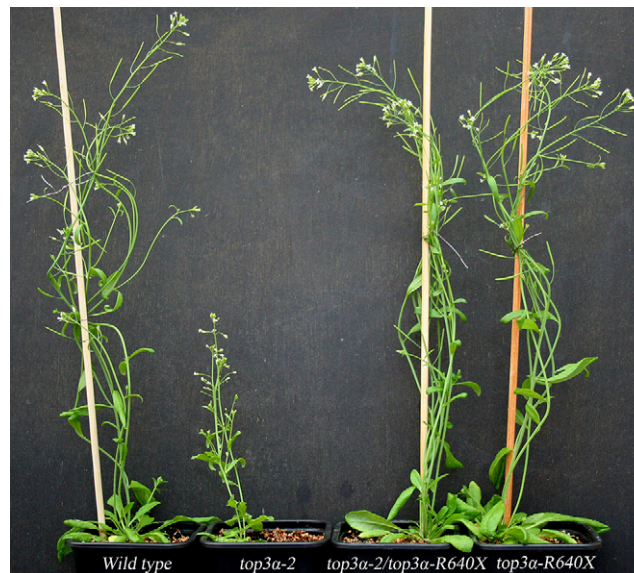

**Fig. S2.** *top3 $\alpha$ -2* but not *top3 $\alpha$ -R640X* confers a growth defect and sterility. Seven-week-old plants shown left to right: wild type, homozygote *top3 $\alpha$ -2* showing reduced growth and sterility, heterozygote *top3 $\alpha$ -2/top3 $\alpha$ -R640X*, and homozygote *top3 $\alpha$ -R640X*.

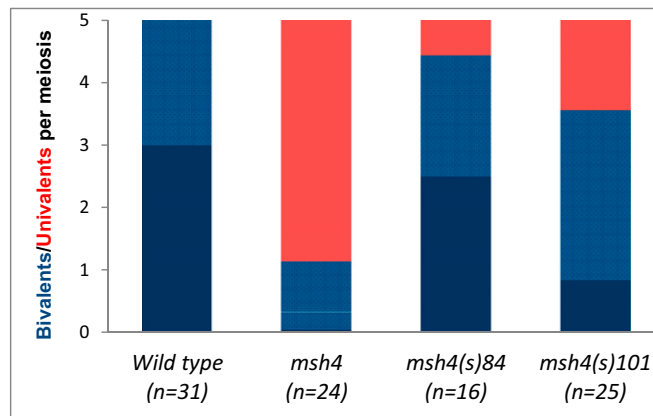

Fig. S3. Average number of ring bivalents (dark blue), rod bivalents (light blue), and pairs of univalents (red) per male meiocyte. The number of cells analyzed is indicated in parentheses. The four genotypes are in the Ler-0 background. *msh4(s)84* and *msh4(s)101* are two allelic *recq4a* mutants.

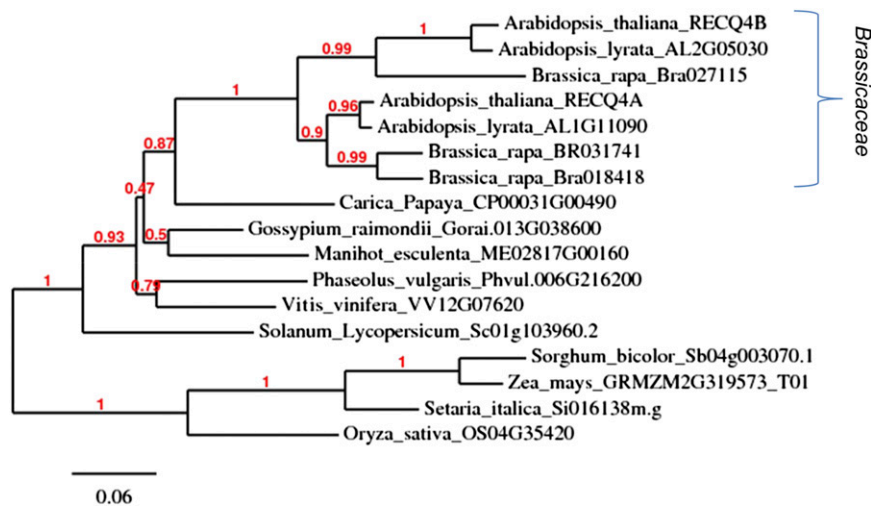

Fig. S4. The *RECQ4A RECQ4B* duplication is specific to *Brassicaceae*. Although *Brassicaceae* species have both RECQ4A and RECQ4B proteins, other plant species typically have only one RECQ4 representative. The analysis was performed on the Phylogeny.fr platform and comprised the following steps: Sequences, collected from PLAZA v2.5 and Phytosome V9.1, were aligned with T-Coffee (v6.85) using the following pairwise alignment methods: the 10 best local alignments (Lalign\_pair), an accurate global alignment (slow\_pair). After alignment, ambiguous regions (i.e., those that contained gaps and/or were poorly aligned) were removed with Gblocks (v0.91b). The phylogenetic tree was reconstructed using the maximum likelihood method implemented in the PhyML program (v3.0 aLRT). Reliability for internal branch was assessed using the aLRT test (SH-Like). Graphical representation and edition of the phylogenetic tree were performed with TreeDyn (v198.3).

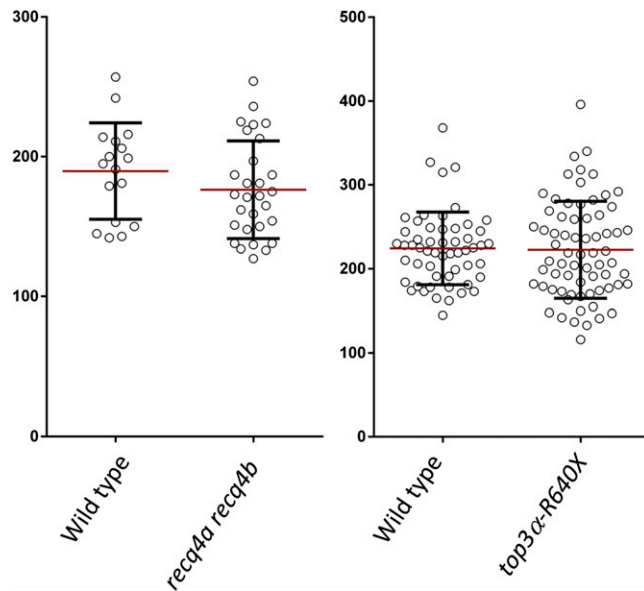

**Fig. S5.** The number of DMC1 foci is not affected in *recq4a recq4b* or *top3α-R640X* mutants. Scatter plots of the number of DMC1 foci per zygotene cell. Wild-type siblings were used as controls. ZYP1 immunolocalization was used as a counterstain to identify zygotene stage.

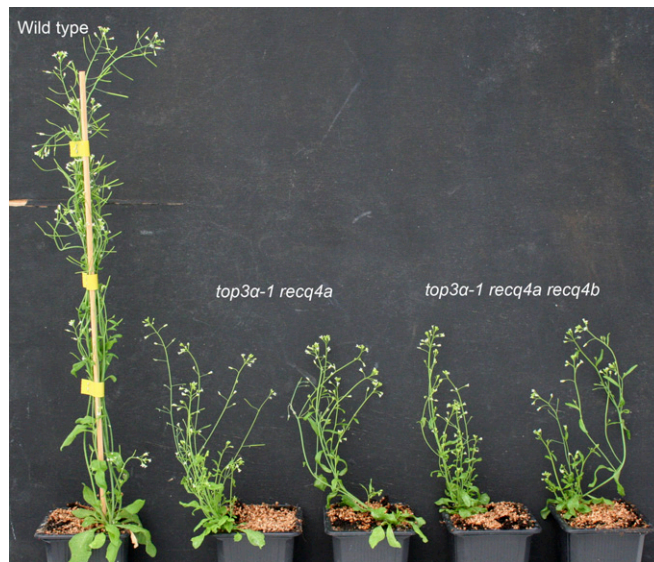

**Fig. S6.** *top3α-1* growth is restored equally by *recq4a* or *recq4a recq4b* mutations. Seven-week-old plants, from left to right: wild type, two *top3α-1 recq4a* double mutants, and two *top3α-1 recq4a recq4b* triple mutants. Single *top3α-1* and *top3α-1 recq4b* plants are not viable, as previously shown (1) and as confirmed by their absence in a population segregating for the three mutations ( $n = 300$ ).

1. Hartung F, Suer S, Puchta H (2007) Two closely related RecQ helicases have antagonistic roles in homologous recombination and DNA repair in *Arabidopsis thaliana*. *Proc Natl Acad Sci USA* 104(47):18836–18841.

**Table S1. Number of seeds per fruit**

| Genotype                                                  | Average no. of seeds per fruit $\pm$ SD |
|-----------------------------------------------------------|-----------------------------------------|
| Wild type ( $n = 40$ )                                    | 61.5 $\pm$ 4.9                          |
| <i>top3<math>\alpha</math>-R640X</i> ( $n = 40$ )         | 61.8 $\pm$ 3.5                          |
| <i>fancm-1</i> ( $n = 40$ )                               | 64.2 $\pm$ 4.3                          |
| <i>top3<math>\alpha</math>-R640X fancm-1</i> ( $n = 40$ ) | 65 $\pm$ 2.7                            |
| Wild type ( $n = 23$ )                                    | 66.7 $\pm$ 6                            |
| <i>msh4</i> ( $n = 30$ )                                  | 5.1 $\pm$ 1.7                           |
| <i>msh4 recq4a-4</i> ( $n = 30$ )                         | 5.8 $\pm$ 2.1                           |
| <i>msh4 recq4b-2</i> ( $n = 30$ )                         | 3.6 $\pm$ 1.9                           |
| <i>msh4 recq4a-4 recq4b-2</i> ( $n = 30$ )                | 58.8 $\pm$ 4.8                          |
| <i>recq4a-4 recq4b-2</i> ( $n = 23$ )                     | 65.6 $\pm$ 5.6                          |
| Wild type ( $n = 40$ )                                    | 53.7 $\pm$ 4.8                          |
| <i>recq4a-4 recq4b-2 fancm-1</i> ( $n = 40$ )             | 49.2 $\pm$ 5.3                          |

The number of fruit counted in each genotype is indicated in parentheses. Wild-type siblings were used as controls.

**Table S2. Proteins identified following TOP3 $\alpha$  TAP**

| AGI code  | Protein name  | C-terminal tag fusion, trial 1 | C-terminal tag fusion, trial 2 | N-terminal tag fusion, trial 1 | N-terminal tag fusion, trial 2 | Total* |
|-----------|---------------|--------------------------------|--------------------------------|--------------------------------|--------------------------------|--------|
| AT5G63920 | TOP3 $\alpha$ | 1                              | 1                              | 1                              | 1                              | 4      |
| AT5G63540 | RMI1          | 1                              | 1                              | 1                              | 1                              | 4      |
| AT1G08390 | RMI2          |                                | 1                              | 1                              | 1                              | 3      |
| AT1G56260 | TEN1          | 1                              |                                | 1                              | 1                              | 3      |
| AT1G10930 | RECQ4A        |                                |                                | 1                              | 1                              | 2      |

\*Total from four experiments.

### Dataset S1. Recombination raw tetrad dataset

#### [Dataset S1](#)

The FTL system tracks the segregation of transgenic markers by cyan, yellow, or red fluorescence of pollen grains within meiotically related tetrads. Drawings above each column represent the different distribution possibilities of markers among the four chromatids and the corresponding distribution of colors in the tetrad, according to the nomenclature of Berchowitz et al. (1). The observed number of each type of tetrad is given for each pair of intervals (e.g., l1b1c are two adjacent intervals on chromosome 1) and for each genotype.

1. Berchowitz LE, Copenhaver GP (2008) Fluorescent Arabidopsis tetrads: A visual assay for quickly developing large crossover and crossover interference data sets. *Nat Protoc* 3(1):41–50.

### Dataset S2. Mass spectrometry data from TAP experiments

#### [Dataset S2](#)
